# Supplementary material
Source: Research Square preprint supplement (doi:10.21203/rs.3.rs-9772820/v1)
Supplement: Supplementary file 1 [file 7f2888af40b40e33b76d0947.docx]

**AGE: GENDER: M / F**

**1. How many years have you been practising in your speciality/as a GP?**

A. 0–5 YEARS B. 5–10 YEARS C. 10–15 YEARS D. 15–20 YEARS E. 20 YEARS OR MORE

**2. DO YOU HAVE CHILDREN? HOW MANY CHILDREN DO YOU HAVE?**

A. None B. 1 C. 2 D. 3 or more

**3. IS THERE ANYONE IN YOUR IMMEDIATE CIRCLE OR FAMILY WHO HAS BEEN DIAGNOSED WITH AUTISM?**

A. YES B. NO

**4. HAVE YOU RECEIVED ANY TRAINING RELATED TO AUTISM SINCE GRADUATING?**

A. YES B. NO

**5. DO YOU CONSIDER YOURSELF TO HAVE SUFFICIENT KNOWLEDGE AND EXPERIENCE REGARDING AUTISM SPECTRUM DISORDER?**

A. YES B. NO

**6. HOW OFTEN DO YOU REFER A CHILD TO THE CRS OUTPATIENT CLINIC WITH SUSPECTED AUTISM?**

A. 1–2 times a week B. 1–2 times a month C. 1–2 times a year D. I have never referred a child

**7. IF YOU DO REFER CHILDREN, IN WHICH AGE RANGE DO YOU MOST OFTEN REFER CHILDREN WITH SUSPECTED AUTISM?**

A. 0–1 years B. 1–2 years C. 2–3 years D. Over 3 years

**8. IN YOUR OPINION, IS SCREENING FOR AUTISM IN CHILDREN ONE OF THE DUTIES OF A GENERAL PRACTITIONER?**

**A. YES B. NO**

**9. IF YOUR ANSWER IS YES, DO YOU HAVE ENOUGH TIME TO CONDUCT AN ASSESSMENT FOR AUTISM?**

A. YES B. NO

**10. AT WHAT AGE**

**?**

**A. 1–2 years B. 2–3 years C. Over 3 years**

**11. DO YOU THINK THERE HAS BEEN AN INCREASE IN THE PREVALENCE OF AUTISM?**

**A. YES B. NO**

**12. IF YOUR ANSWER IS YES, WHAT COULD BE THE REASON FOR THIS?**

**-**

**13. SYMPTOMS OF AUTISM BEGIN AFTER THE AGE OF 3.**

A. YES B. NO

**14. HYPERACTIVITY IS ONE OF THE MAIN SYMPTOMS OF AUTISM.**

A. YES B. NO

**15. THE INTELLECTUAL ABILITY OF INDIVIDUALS WITH AUTISM IS NORMAL OR ABOVE AVERAGE.**

A. YES B. NO

**16. IN WHICH GENDER IS AUTISM MORE COMMON?**

A. Girls B. Boys C. Equal

**17. EXCESSIVE EXPOSURE TO TV, PHONES AND COMPUTERS IS A CAUSE OF AUTISM.**

A. YES B. NO

**18. SERIOUS LIFE EVENTS SUCH AS DIVORCE, MIGRATION, ACCIDENTS OR THE LOSS OF A FAMILY MEMBER ARE CAUSES OF AUTISM.**

A. YES B. NO

**19. A lack of attention within the family is a cause of autism.**

A. YES B. NO

**20. PARENTS’ INAPPROPRIATE BEHAVIOUR IS A CAUSE OF AUTISM.**

A. YES B. NO

**21. HEAVY METALS ARE AMONG THE CAUSES OF AUTISM.**

A. YES B. NO

**22. VACCINES ARE A CAUSE OF AUTISM.**

A. YES B. NO

**23. AUTISM IS A TREATABLE CONDITION.**

A. YES B. NO

**24. DIET HAS A POSITIVE EFFECT IN THE TREATMENT OF AUTISM.**

A. YES B. NO

**25. Vitamin and mineral supplements are effective in the treatment of autism.**

A. YES B. NO

**26. HYPERBARIC OXYGEN THERAPY IS EFFECTIVE IN THE TREATMENT OF AUTISM.**

A. YES B. NO

**27. IN YOUR OPINION, WHAT IS THE PRIMARY TREATMENT FOR AUTISM?**

A. PHARMACOTHERAPY B. SPECIAL EDUCATION C. DIET D. FAMILY SUPPORT

**28. IN YOUR OPINION, HOW ALARMING ARE THE FOLLOWING CONDITIONS OR COMPLAINTS IN INFANCY (0–2 YEARS) IN RELATION TO AUTISM? (0: NOT AT ALL, 4: VERY MUCH)**

-Children with feeding disorders, frequent vomiting, or gastrointestinal problems 0 1 2 3 4

-BABIES WHO DO NOT CRY WHEN LEFT ALONE 0 1 2 3 4

-Restless, frequently crying babies 0 1 2 3 4

-Babies who can go from their mother’s arms to strangers 0 1 2 3 4

-IGNORING WHAT IS SAID (NOT RESPONDING) 0 1 2 3 4

-NOT LOOKING WHEN CALLED BY NAME (GIVING THE IMPRESSION OF NOT HEARING) 0 1 2 3 4

-LACK OF AGE-APPROPRIATE SPEECH 0 1 2 3 4

-EXCESSIVE RELIANCE ON DAILY ROUTINES 0 1 2 3 4

-Sniffing objects 0 1 2 3 4

-INDIFFERENCE TO PAIN/HEAT 0 1 2 3 4

-DELAY IN MOTOR DEVELOPMENT 0 1 2 3 4

-REFUSAL TO BREASTFEED 0 1 2 3 4

**29. IN YOUR OPINION, HOW ALARMING ARE THE FOLLOWING SITUATIONS/COMPLAINTS DURING CHILDHOOD (AGES 2–6) IN TERMS OF AUTISM?** (**(0: NOT AT ALL, 4: VERY ALARMING)**

-Inability to establish appropriate play relationships with peers 0 1 2 3 4

-Children with complaints of excessive hyperactivity 0 1 2 3 4

-LACK OF AGE-APPROPRIATE SPEECH 0 1 2 3 4

-FAILURE TO UNDERSTAND WHAT IS SAID OR FOLLOW INSTRUCTIONS 0 1 2 3 4

-FAILURE TO LOOK WHEN CALLED BY NAME (GIVING THE IMPRESSION OF NOT HEARING) 0 1 2 3 4

-Excessive play with water 0 1 2 3 4

-Excessive interest in spinning objects 0 1 2 3 4

-REPETITIVE MOVEMENTS (FLAPPING, ROCKING, SPINNING) 0 1 2 3 4

-FAILURE TO LOOK AT THE OBJECT BEING POINTED TO OR SHOWN 0 1 2 3 4

-DELAY IN TOILET TRAINING 0 1 2 3 4

-HAVING LEARNED TO READ 0 1 2 3 4

-Inability to adapt to changes 0 1 2 3 4

-Sniffing Objects 0 1 2 3 4

-Indifference to pain/heat 0 1 2 3 4
